# Supplementary material for: Cross-validation of an algorithm detecting acute gastroenteritis episodes from prescribed drug dispensing data in France: comparison with clinical data reported in a primary care surveillance system, winter seasons 2014/15 to 2016/17
Source: PubMed Central journal article supplement (PMC6545010; doi:10.1186/s12874-019-0745-5), 2019-05-31
Supplement: 12874_2019_745_MOESM3_ESM.pdf [file 12874_2019_745_MOESM3_ESM.pdf]

**Additional file 3.** Number of AG episodes per patient detected from drug dispensing data for patients included in the study, seasons 2014/15 to 2016/17 (week number 36 of year N to week number 15 of year N+1)

| Number of AG episodes per patient per season | Number of patients (%) |                   |                   |
|----------------------------------------------|------------------------|-------------------|-------------------|
|                                              | Season 2014/15         | Season 2015/16    | Season 2016/17    |
| 1                                            | 902 984 (93.4%)        | 1 105 267 (93.1%) | 1 206 148 (93.1%) |
| 2                                            | 57 243 (5.9%)          | 73 768 (6.2%)     | 81 023 (6.2%)     |
| 3                                            | 6 154 (0.6%)           | 8 315 (0.7%)      | 8 986 (0.7%)      |
