# Supplementary material for: Cross-validation of an algorithm detecting acute gastroenteritis episodes from prescribed drug dispensing data in France: comparison with clinical data reported in a primary care surveillance system, winter seasons 2014/15 to 2016/17
Source: PubMed Central journal article supplement (PMC6545010; doi:10.1186/s12874-019-0745-5), 2019-05-31

Season 2014–15

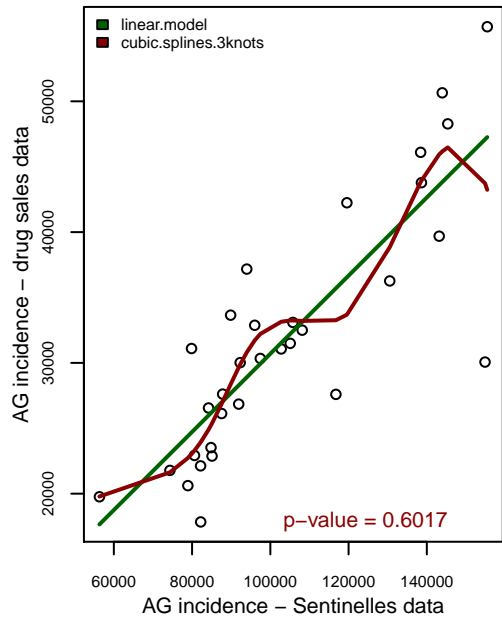

Season 2015–16

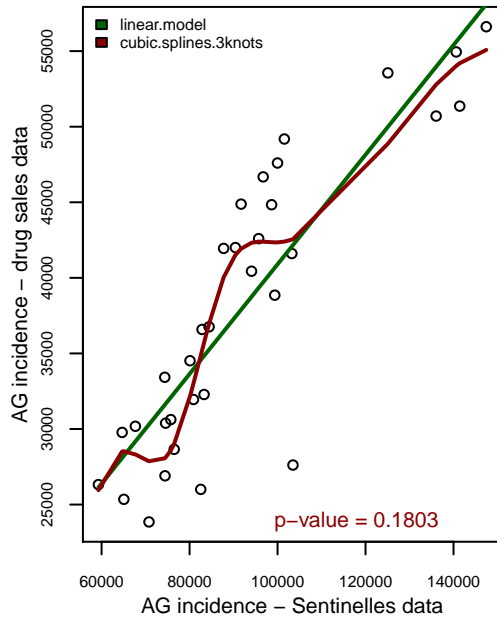

Season 2016–17

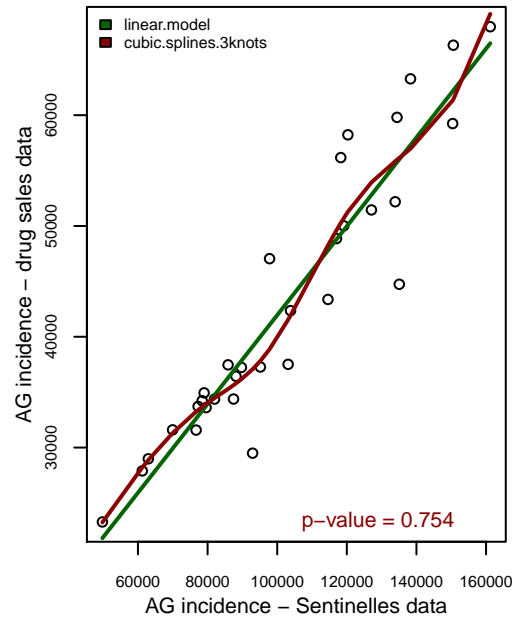

Supplement: 12874_2019_745_MOESM4_ESM.pdf [file 12874_2019_745_MOESM4_ESM.pdf]
