# Supplementary material for: Cross-validation of an algorithm detecting acute gastroenteritis episodes from prescribed drug dispensing data in France: comparison with clinical data reported in a primary care surveillance system, winter seasons 2014/15 to 2016/17
Source: Springer Nature journal article supplement (doi:10.1186/s12874-019-0745-5), 2019-05-31
Supplement: MOESM5 [file 16763810]

**Additional file 4.** Correlation between the weekly AG incidences estimated using the AG discrimination algorithm applied on drug dispensing data available in the LTD database and the weekly AG incidences estimated at the *Sentinelles* Network, overall and by age group, at no time lag, at one week of time lag and at one week of time lead between the *Sentinelles* data and drug dispensing data, winter seasons 2014/15 to 2016/17 (week number 36 of year N to week number 15 of year N+1)

| Season               | Age Group    | Correlations [95% CI] |                       |                       |
|----------------------|--------------|-----------------------|-----------------------|-----------------------|
|                      |              | No time lag           | One week lag          | One week lead         |
| 2014/15 <sup>a</sup> | All ages     | 0.84<br>[0.69 ; 0.92] | 0.87<br>[0.74 ; 0.94] | 0.61<br>[0.32 ; 0.79] |
| 2015/16              | All ages     | 0.87<br>[0.75 ; 0.93] | 0.84<br>[0.69 ; 0.92] | 0.59<br>[0.31 ; 0.78] |
|                      | 0 – 4 y.o.   | 0.75<br>[0.54 ; 0.87] | 0.67<br>[0.42 ; 0.82] | 0.47<br>[0.14 ; 0.70] |
|                      | 5 – 14 y.o.  | 0.80<br>[0.63 ; 0.90] | 0.75<br>[0.54 ; 0.87] | 0.42<br>[0.09 ; 0.67] |
|                      | 15 – 64 y.o. | 0.87<br>[0.75 ; 0.93] | 0.84<br>[0.70 ; 0.92] | 0.61<br>[0.34 ; 0.79] |
|                      | 65+ y.o.     | 0.75<br>[0.55 ; 0.87] | 0.74<br>[0.53 ; 0.87] | 0.66<br>[0.40 ; 0.82] |
| 2016/17              | All ages     | 0.94<br>[0.88 ; 0.97] | 0.92<br>[0.84 ; 0.96] | 0.74<br>[0.52 ; 0.86] |
|                      | 0 – 4 y.o.   | 0.91<br>[0.82 ; 0.95] | 0.75<br>[0.53 ; 0.87] | 0.63<br>[0.35 ; 0.80] |
|                      | 5 – 14 y.o.  | 0.90<br>[0.81 ; 0.95] | 0.81<br>[0.64 ; 0.90] | 0.54<br>[0.23 ; 0.75] |
|                      | 15 – 64 y.o. | 0.92<br>[0.84 ; 0.96] | 0.93<br>[0.85 ; 0.96] | 0.72<br>[0.50 ; 0.86] |
|                      | 65+ y.o.     | 0.87<br>[0.74 ; 0.93] | 0.86<br>[0.72 ; 0.93] | 0.69<br>[0.45 ; 0.84] |

---

<sup>a</sup> Due to limitations of the drug dispense database, the analysis at age group level could not be carried out for season 2014/15
