# Supplementary material for: Cross-validation of an algorithm detecting acute gastroenteritis episodes from prescribed drug dispensing data in France: comparison with clinical data reported in a primary care surveillance system, winter seasons 2014/15 to 2016/17
Source: Springer Nature journal article supplement (doi:10.1186/s12874-019-0745-5), 2019-05-31
Supplement: MOESM6 [file 16763810]

**Additional File 5.** Pearson's correlations at region level, all age groups pooled, winter seasons 2014/15 to 2016/17 (week number 36 of year N to week number 15 of year N+1)

| Region                     | Pearson's Correlation [95% CI] |                    |                    |
|----------------------------|--------------------------------|--------------------|--------------------|
|                            | Season 2014/15                 | Season 2015/16     | Season 2016/17     |
| AUVERGNE-RHONE-ALPES       | 0.68 [0.44 ; 0.83]             | 0.73 [0.52 ; 0.86] | 0.88 [0.76 ; 0.94] |
| BOURGOGNE-FRANCHE-COMTE    | 0.47 [0.15 ; 0.71]             | 0.62 [0.35 ; 0.79] | 0.81 [0.64 ; 0.90] |
| BRETAGNE                   | 0.63 [0.35 ; 0.80]             | 0.60 [0.32 ; 0.78] | 0.53 [0.22 ; 0.74] |
| CENTRE-VAL-DE-LOIRE        | 0.83 [0.67 ; 0.91]             | 0.70 [0.47 ; 0.84] | 0.74 [0.52 ; 0.86] |
| CORSE                      | 0.77 [0.57 ; 0.88]             | 0.57 [0.29 ; 0.77] | 0.49 [0.17 ; 0.72] |
| GRAND EST                  | 0.71 [0.48 ; 0.85]             | 0.43 [0.10 ; 0.67] | 0.55 [0.25 ; 0.76] |
| HAUTS-DE-FRANCE            | 0.53 [0.23 ; 0.74]             | 0.55 [0.26 ; 0.75] | 0.81 [0.64 ; 0.90] |
| ILE-DE-FRANCE              | 0.45 [0.11 ; 0.69]             | 0.71 [0.48 ; 0.84] | 0.69 [0.44 ; 0.83] |
| NORMANDIE                  | 0.70 [0.46 ; 0.84]             | 0.83 [0.67 ; 0.91] | 0.76 [0.55 ; 0.87] |
| NOUVELLE-AQUITAINE         | 0.55 [0.25 ; 0.75]             | 0.73 [0.52 ; 0.86] | 0.89 [0.78 ; 0.94] |
| OCCITANIE                  | 0.78 [0.59 ; 0.89]             | 0.61 [0.34 ; 0.79] | 0.84 [0.69 ; 0.92] |
| PAYS-DE-LA-LOIRE           | 0.53 [0.23 ; 0.74]             | 0.57 [0.28 ; 0.76] | 0.55 [0.26 ; 0.76] |
| PROVENCE-ALPES-COTE-D-AZUR | 0.56 [0.26 ; 0.76]             | 0.62 [0.36 ; 0.80] | 0.79 [0.61 ; 0.89] |
